# Supplementary material
Source: PubMed Central journal article supplement (PMC5335534)
Supplement: AEM.03186-16_zam999117716s1.pdf [file AEM.03186-16_zam999117716s1.pdf]

**Supplementary Materials**

**for**

**YMC-2011, a Temperate Phage of *Streptococcus salivarius* 57.I (AEM03186-16R1)**

**Table S1.** Properties of ORFs of YMC-2011

| locus_tag       | Direction <sup>a</sup> | Protein<br>(aa/kDa) | Putative function                    | Similarity <sup>b</sup>                 | Best match <sup>c</sup> | Accession no. <sup>d</sup> |
|-----------------|------------------------|---------------------|--------------------------------------|-----------------------------------------|-------------------------|----------------------------|
| Ssal_phage00001 | +                      | 952/104.72          | host specificity protein             | Streptococcus phage Abc2, SP-Abc2_gp16  | 88 (733/953, 77%)       | YP_003347425.1             |
| Ssal_phage00002 | +                      | 681/74.91           | minor structural protein             | Streptococcus phage 7201, ORF39         | 81 (387/557, 69%)       | NP_038340.1                |
| Ssal_phage00003 | +                      | 89/9.79             | hypothetical protein                 | Streptococcus phage Dp-1, orf56         | 68 (43/84, 51%)         | YP_004306944.1             |
| Ssal_phage00004 | +                      | 142/15.62           | holin                                | Streptococcus phage Sfi19, orf141       | 84 (84/123, 68%)        | NP_049940.1                |
| Ssal_phage00006 | +                      | 73/8.03             | holin                                | Streptococcus phage Abc2, orf21         | 87 (58/71, 82%)         | YP_003347430.1             |
| Ssal_phage00007 | +                      | 248/27.28           | phage-associated cell wall hydrolase | Streptococcus phage phi3396, phi3396_56 | 70 (150/255, 59%)       | YP_001039943.1             |
| Ssal_phage00009 | +                      | 60/6.6              | hypothetical protein                 | NA                                      | NA                      | NA                         |
| Ssal_phage00010 | -                      | 353/38.83           | integrase                            | Streptococcus phage O1205, ORF1         | 95 (321/353, 91%)       | NP_695079.1                |
| Ssal_phage00011 | -                      | 151/16.61           | hypothetical protein                 | Streptococcus thermophilus LMD-9        | 55 (62/151, 41%)        | YP_820257.1                |
| Ssal_phage00012 | -                      | 121/13.31           | CI-like repressor                    | Streptococcus phage Sfi21 , orf122 gp   | 93 (97/120, 81%)        | NP_049992.1                |
| Ssal_phage00013 | -                      | 114/12.54           | CI-like repressor                    | Streptococcus phage Sfi21, orf127 gp    | 67 (50/96, 52%)         | NP_049993.1                |
| Ssal_phage00014 | +                      | 67/7.37             | hypothetical protein                 | Streptococcus phage Abc2, orf25         | 93 (59/67, 88%)         | YP_003347434.1             |
| Ssal_phage00016 | -                      | 71/7.81             | hypothetical protein                 | NA                                      | NA                      | NA                         |
| Ssal_phage00017 | +                      | 244/26.84           | phage antirepressor protein          | Streptococcus phage Abc2, orf26         | 65 (116/205, 57%)       | YP_003347435.1             |

|                 |   |            |                      |                                             |                   |                |
|-----------------|---|------------|----------------------|---------------------------------------------|-------------------|----------------|
| Ssal_phage00018 | + | 37/4.07    | hypothetical protein | NA                                          | NA                | NA             |
| Ssal_phage00020 | + | 1993/10.23 | hypothetical protein | Streptococcus phage Sfi21, orf80<br>(92) gp | 95 (79/93, 85%)   | NP_049996.1    |
| Ssal_phage00022 | + | 51/5.61    | hypothetical protein | Streptococcus phage O1205, ORF7             | 71 (26/45, 58%)   | NP_695085.1    |
| Ssal_phage00024 | + | 576/63.36  | hypothetical protein | Streptococcus salivarius JIM8777            | 79 (418/586, 71%) | YP_006070072.1 |
| Ssal_phage00025 | + | 106/11.66  | hypothetical protein | Streptococcus salivarius JIM8777            | 84 (76/101, 75%)  | YP_006070073.1 |
| Ssal_phage00026 | + | 157/17.27  | hypothetical protein | Streptococcus phage ALQ13.2,<br>orf33       | 78 (93/157, 59%)  | YP_003344879.1 |
| Ssal_phage00027 | + | 233/25.63  | hypothetical protein | Streptococcus phage 858, orf36              | 99 (227/233, 97%) | YP_001686830   |
| Ssal_phage00028 | + | 451/49.61  | helicase             | Streptococcus phage 858, orf37              | 92 (417/451, 92%) | YP_001686831.1 |
| Ssal_phage00029 | + | 157/17.27  | phage protein        | Streptococcus phage 858, orf38              | 94 (142/157, 90%) | YP_001686832.1 |
| Ssal_phage00030 | + | 272/29.92  | phage protein        | Streptococcus phage 858, orf39              | 91 (237/271, 87%) | YP_001686833.1 |
| Ssal_phage00031 | + | 519/57.09  | primase              | Streptococcus phage 858, orf40              | 93 (466/514, 91%) | YP_001686834.1 |
| Ssal_phage00032 | + | 107/11.77  | phage protein        | Streptococcus phage 858, orf41              | 96 (96/103, 93%)  | YP_001686835.1 |
| Ssal_phage00033 | + | 72/7.92    | hypothetical protein | Streptococcus phage DT1,Orf39               | 77 (53/71, 75%)   | NP_049427.1    |
| Ssal_phage00034 | + | 60/6.6     | hypothetical protein | NA                                          | NA                | NA             |
| Ssal_phage00035 | + | 61/6.71    | hypothetical protein | NA                                          | NA                | NA             |
| Ssal_phage00036 | + | 52/5.72    | hypothetical protein | Streptococcus phage Sfi19, orf51            | 79 (38/52, 73%)   | NP_049960.1    |
| Ssal_phage00037 | + | 96/10.56   | hypothetical protein | Streptococcus phage O1205, ORF21            | 89 (71/83, 86%)   | NP_695099.1    |
| Ssal_phage00038 | + | 115/12.65  | hypothetical protein | NA                                          | NA                | NA             |
| Ssal_phage00039 | + | 235/25.85  | hypothetical protein | Streptococcus phage Sfi19, orf235           | 60 (125/243, 51%) | NP_049965.1    |
| Ssal_phage00040 | + | 132/14.52  | hypothetical protein | Streptococcus phage 7201, ORF19             | 92 (116/132, 88%) | NP_038320.1    |
| Ssal_phage00041 | + | 144/15.84  | HNH endonuclease     | Streptococcus phage Abc2, orf48             | 96 (133/144, 92%) | YP_003347457.1 |

|                 |   |           |                             |                                   |                   |                |
|-----------------|---|-----------|-----------------------------|-----------------------------------|-------------------|----------------|
| Ssal_phage00042 | + | 193/21.23 | terminase small subunit     | Streptococcus phage Sfi19, orf161 | 84 (118/152, 78%) | NP_049925.1    |
| Ssal_phage00043 | - | 46/5.06   | hypothetical protein        | NA                                | NA                | NA             |
| Ssal_phage00045 | + | 292/32.12 | hypothetical protein        | NA                                | NA                | NA             |
| Ssal_phage00046 | + | 63/6.93   | hypothetical protein        | NA                                | NA                | NA             |
| Ssal_phage00047 | + | 229/25.19 | terminase small subunit     | Streptococcus phage DT1,orf3      | 82 (148/215, 69%) | NP_049391.1    |
| Ssal_phage00048 | + | 390/42.9  | terminase large subunit     | Streptococcus phage Abc2, orf2    | 91 (325/391, 83%) | YP_003347411.1 |
| Ssal_phage00049 | + | 59/6.49   | head-tail joining protein   | Streptococcus phage DT1, orf5     | 98 (52/59, 88%)   | NP_049393.1    |
| Ssal_phage00050 | + | 383/42.13 | portal protein              | Streptococcus phage Abc2, orf4    | 96 (345/386, 89%) | YP_003347413.1 |
| Ssal_phage00051 | + | 222/24.42 | scaffold protein            | Streptococcus phage Abc2, orf5    | 94 (193/222, 87%) | YP_003347414.1 |
| Ssal_phage00052 | + | 396/43.56 | major head protein          | Streptococcus phage Sfi19, orf397 | 95 (357/392, 91%) | NP_049929.1    |
| Ssal_phage00053 | + | 104/11.44 | DNA packaging protein       | Streptococcus phage Sfi19, orf104 | 96 (95/104, 91%)  | NP_049930.1    |
| Ssal_phage00054 | + | 116/12.76 | capsid-tail joining protein | Streptococcus phage Abc2, orf8    | 94 (104/116, 90%) | YP_003347417.1 |
| Ssal_phage00055 | + | 142/15.62 | tail component protein      | Streptococcus phage Sfi19, orf153 | 96 (125/139, 90%) | NP_049932.1    |
| Ssal_phage00056 | + | 123/13.53 | tail component protein      | Streptococcus phage DT1, orf12    | 97 (112/123, 91%) | NP_049400.1    |
| Ssal_phage00057 | + | 205/22.55 | major tail protein          | Streptococcus phage Abc2, orf11   | 92 (163/203, 80%) | YP_003347420.1 |

|                 |   |           |                        |                                    |                   |                |
|-----------------|---|-----------|------------------------|------------------------------------|-------------------|----------------|
| Ssal_phage00058 | + | 118/12.98 | tail component protein | Streptococcus phage DT1, orf14     | 92 (96/118, 81%)  | NP_049402.1    |
| Ssal_phage00059 | + | 47/5.17   | hypothetical protein   | NA                                 | NA                | NA             |
| Ssal_phage00061 | + | 773/85.03 | minor tail protein     | Streptococcus phage Sfi19, orf1626 | 90 (665/791, 84%) | NP_049935.1    |
| Ssal_phage00063 | + | 890/97.9  | minor tail protein     | Streptococcus phage Sfi21, orf1560 | 85 (682/889, 77%) | NP_049978.1    |
| Ssal_phage00064 | + | 518/56.98 | tail component protein | Streptococcus phage Abc2, orf15    | 87 (404/523, 77%) | YP_003347424.1 |

<sup>a</sup> The relative orientation of ORFs: +, forward; -, reverse.

<sup>b</sup> The target to which the ORF shares the highest homology. NA, not available.

<sup>c</sup> % similarity. Numbers in parentheses are the length of the alignment/target size and % identity.

<sup>d</sup> GenBank number of the locus listed under Similarity.

Fig. S1A

# A

```
ALQ13.2 32341-----TGAAAAATAAAGGGTTTC
01205    8875-----CCGCAGGTTATTGCAACAAGTAACCGTAAAACCCATTGAAAAATAAAGGGTTTC
DT1      30059-----CCGCAGGTTATTGCAACAAGTAACCGTAAAACCCATTGAAAAATAAAGGGTTTC
2972     32216----TACCTACAGACACCAA-GAGCGGTGTCCTCGAAAGTCCTTGATAGAAAAGGAATTG
YMC-2011 19816--GGTTACCGTAAAAAATGACATACGGTAACCCTCACAAACCCTTTAATGATACCGTTTT
                                         * * * * *

GGTTGCTTTAGTTACTTAGTTACTACTTTTTAAATATATTTATAA-TAAATAAATAAATAA
GGTTGCTTTAGTTACTTAGTTACTACTTTTTAAATATATTTATAAAATAAATAAATAAATAA
GGTTGCTTTAGTTACTTAGTTACTATATATATATATATATTTATAAAATAAATAAATAAATAA
ACACGCTTTAGACACTAAGATACTACTTTTTATATATATATTTAAAA-TAAATAAATAAATAA
TCTCTACTTAGTTACCTTGTACCTTATTTATATATTTGAAATAA-TAAATAAATAAATAA
      **** ** * *** * ** **** * ** *****

ATATA-TATATATATAGAGAGCCATCAAAAAACGTGTAACTAAGTAACATAAG--TG
ATAAA-TATATATAGAGAGAGA--C-TTAAAAAACGTGTAACTAAGTAACATAAG--TG
ATATA-TATATATAGAGAGAGA--CACTTAAAAAACGTGTAACTAAGTAACATAAG--TG
ATATA-TATATAGAGAGAGAG-----TCAAAAAATAAGGTGCCTCGGTGCCCAAAA--GT
ATAAAGTATATATAAGTAGAGC--TTACAACGGTAACGGTAACGAATTAGCAAAAAACA
***** ***** * **** * ** * * * * *

GCCAGAAACCTTGATATATAA-GGGTTTGCGGCGGTTACGAGTAAAAGTAACTGTTACTG
GCCAGAAACCTTGATATATAAAGGGTTTGCGGTGGTTACGAGTAAAAGTAACTGTTACTG
GCCAGAAACCTTTATATATAA-GGGTTTTTCGGCGGTTACGAGTAAAAGTAACTGTTACTG
GTCAAAAACCCTTATATATCAAGGGTTTTTCG-TGGGCACGTGCTAAGAGTGTCTTGGATGG
GTCAAAAACCGTTGATAT-CATTGGGTTTTAGACGGTTACTGTTCTAAA-AATAAGAAAGG
* * * * * * **** ***** * ** * * * * *

TAATCGAGTAACAATTAGGAGAAAAAATACTTAGAGATTAA-32574
TAATCGAGTAACAAA-AGGAGAAAAAA-9127
TAATCGAGTAACAAA-AGGATAAAAAA-30311
TGACCGGTGACAAATTAGGAGATAT-32465
TAACTATTTA-20057
* *
```

**B**

→ Ssal\_phage00031

19807 ACCG TTTAGGTTAC CgTAAAAAAT GACATACGGT AACCCTCACA AACCCTTTAA  
T V \*\*\*

TGaTACCgTT TTTCTCTACT TAGTTACcTT GTTACcTTAT TTATATATTG AAAtAATAAA

TAAATAAATA AATAAAGTAT ATATAAGTAG AGCTTACAAC GGTAACGGTA ACGAATTAGC

AAAAAACAG TCAAAACCGT TGATATCATT GGGTTTTAGA CGGTTACTTGT TCTAAAAATA

RBS ↗ Ssal\_phage00032

AGAAAGGTAA CTATTTAGTG AGTTCTGAAC ATAGTATTCA AAACCAAATT CGAGTGGAAT  
V S S E H S I Q N Q I R V E

**FIG. S1. Nucleotide sequence analysis of the putative *ori* of YMC-2011.** (A) Sequence alignment of the putative *ori* sequences of phages ALQ13.2, O1205, DT1, 2972 and YMC-2011. The numbers indicate position of each sequence on the phage genome. Identical bases are indicated by asterisks below the alignment. Dots above the sequence denote 10-base divisions. (B) The putative *ori* of YMC-2011 is located in the intergenic region between Ssal\_phage00031 and Ssal\_phage00032. The location of the stop codon of Ssal\_phage00031 is indicated by asterisks. The start codon and RBS of Ssal\_phage00032 are indicated by a bent arrow and an overline, respectively. The deduced aa sequence of the ORFs is listed below the nucleotide sequence. The putative DnaA boxes are underlined and italicized. The two sets of direct repeats are shaded in light grey and black, respectively. Nucleotides that differ between repeat sequences are in lower case. The inverted repeats are indicated by horizontal arrows above the sequence.





Fig. S3

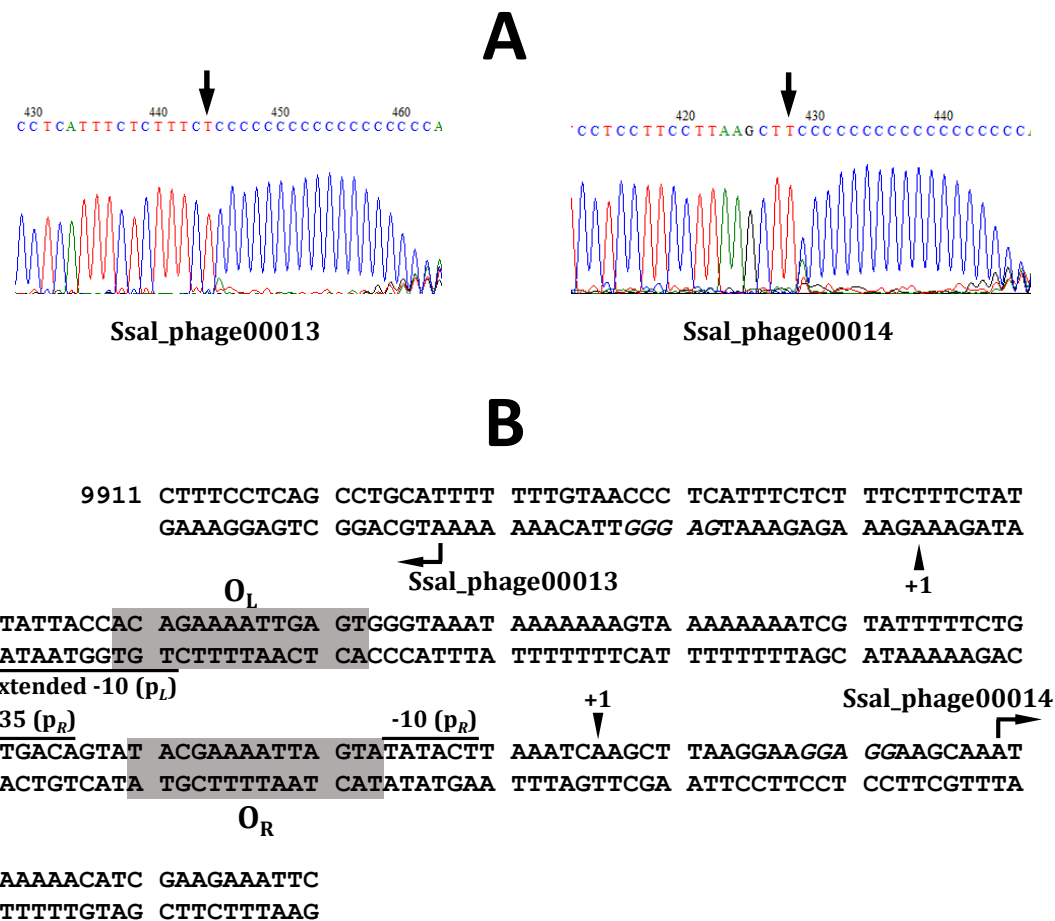

**FIG. S3. Identification and sequence analysis of the promoters of Ssal\_phage00013 and Ssal\_phage00014.** (A) The transcription initiation sites of Ssal\_phage00013 and Ssal\_phage00014 were determined by 5' RACE. Sequencing analysis of the final PCR products described in Materials and Methods is shown. The transcription initiation site is indicated by a vertical arrow. (B) The intergenic region of Ssal\_phage00013 and Ssal\_phage00014 showing the putative promoter sequences of  $p_L$  and  $p_R$ . The transcription initiation sites of these two ORFs determined by 5' RACE are indicated by +1. The RBS are in italics. The extended -10 element of Ssal\_phage00013 promoter ( $p_L$ ) and the putative -35 and -10 elements of Ssal\_phage00014 promoter ( $p_R$ ) are underlined and overlined, respectively. The inverted repeats between the -10 and -35 elements,  $O_L$  and  $O_R$ , are highlighted.
